# Supplementary material for: Oil Media on Paper: Investigating the Interaction of Cold-Pressed Linseed Oil with Paper Supports with FTIR Analysis
Source: MDPI journal article supplement (doi:10.3390/polym15112567), 2023-06-02
Supplement: s1 [file s1]

## SUPPORTIVE INFORMATION

## Tables

**Table S1** Description of the materials used for the preparation of mock-ups, as provided by their manufacturers.

|    |                               |                                                                                                                                                           |
|----|-------------------------------|-----------------------------------------------------------------------------------------------------------------------------------------------------------|
| 1. | Cold-pressed Linseed oil (CP) | An oil extracted without the use of heat, <i>Windsor and Newton</i>                                                                                       |
| 2. | Refined linseed oil (RF)      | A low-viscosity alkali refined oil of pale colour which is a slower drying variant of the linseed oils, <i>Windsor and Newton</i>                         |
| 3. | Stand oil (StL)               | A pale viscous oil that slows drying while imparting a tough, smooth enamel finish with no brush marks and excellent levelling, <i>Windsor and Newton</i> |
| 4. | <i>Cotton (C)</i>             | Cotton pHoton™ high purity paper by the Munktel paper Mill, <i>by Conservation by Design Limited, UK</i>                                                  |
| 3. | <i>Montval (M)</i>            | Montval watercolour paper, complying with ISO Standard 9706 requirements for permanence, by <i>Canson®</i> , France                                       |
| 4. | <i>Kraft (K)</i>              | A wrapping paper, <i>by Dionysopoulos paper trade, Athens, Greece</i>                                                                                     |

**Table S2** Characteristic infrared absorption bands for cellulosic fibres [27, 33-39]\*

| Position (cm <sup>-1</sup> ) | Assignment                                                           |
|------------------------------|----------------------------------------------------------------------|
| 3600-3000 (s, br)            | $\nu(\text{OH})$ free, hydroxyl stretching vibrations                |
| 3000-2800                    | $\nu(\text{C-H})$ , carbon - hydrogen stretching vibrations          |
| 1738                         | $\nu(\text{C=O})$ , ester                                            |
| 1650                         | $\delta\text{H-O-H}$ bending (absorbed water)                        |
| 1595                         | $\nu(\text{C=C})$ aromatic in-plane                                  |
| 1457, 1369, 1337, 1248, 1236 | exocyclic CH <sub>2</sub> deformations of the glucose units          |
| 1429 (m), 1316 (m-s)         | $\delta\text{C-C-C} + \delta\text{ipC-O-H}$ , endocyclic C-C-H bends |
| 1205                         | CO stretching                                                        |
| 1110, 1054, 1031             | combination of C-O stretch and C-O bend                              |
| 896                          | C-C[1]-H deformation, marker of the $\beta$ -glycosidic linkage      |
| 710, 663, 604, 557, 433      | appear due to ring vibrational modes                                 |

**Table S3** Characteristic infrared absorption bands for lignocellulosic papers [27, 37]

| Position (cm <sup>-1</sup> ) | Assignment                                                                                                                                |
|------------------------------|-------------------------------------------------------------------------------------------------------------------------------------------|
| 1738 (m-s)                   | $\nu\text{C=O}$ , esters in hemicellulose fraction                                                                                        |
| 1652 (m-s)                   | $\nu\text{C=O}$ (conjugated), conifer aldehyde                                                                                            |
| 1590                         | generally attributed to aromatics and possibly, to carboxylates                                                                           |
| 1505                         | aromatics, a lignin marker                                                                                                                |
| 1450                         | recorded in historic papers                                                                                                               |
| ~1265                        | broad absorbance due to C-O of guaiacyl ring of lignin residues                                                                           |
| ~900                         | glycosidic linkages in polysaccharide units                                                                                               |
| 808                          | typical of hemicelluloses                                                                                                                 |
| 1202-1204                    | mainly due to the exocyclic CH <sub>2</sub> twisting of the glucose rings with contributions from other vibrations, lignin removal marker |

|            |                                                                               |
|------------|-------------------------------------------------------------------------------|
| 1050, 1030 | various C–O vibrations of the polysaccharide structure, lignin removal marker |
|------------|-------------------------------------------------------------------------------|

**Table S4** Common vibrations in triacylglycerols [ 27]

| Saturated                 | Unsaturated               |                                                                          |
|---------------------------|---------------------------|--------------------------------------------------------------------------|
| Position cm <sup>-1</sup> | Position cm <sup>-1</sup> | Assignment                                                               |
|                           | 3450 (w,br)               |                                                                          |
| 3450 (w,br)               | 3011 (w, br)              | $\nu$ O-H, <i>hydroxyls, hydroperoxides</i>                              |
|                           | 3011 (m-w)                | $\nu$ =C-H (cis), <i>unconjugated cis double bonds</i>                   |
| 2931                      | 2958 (sh, m)              | vasCH <sub>3</sub> , hydrocarbon chain                                   |
|                           | 2928 (s)                  | vasC-H in CH <sub>2</sub>                                                |
| 2859                      | 2875 sh, vw               | vsC-H in CH <sub>3</sub>                                                 |
| 2828                      | 2855 s                    | vsC-H in CH <sub>2</sub> , symmetric stretching                          |
| 1727 vs                   |                           | $\nu$ C=O, <i>saturated ketones</i>                                      |
|                           | 1743 vs                   | $\nu$ C=O, <i>ester carbonyl</i>                                         |
|                           | 1653 (w)                  | $\nu$ C=C, <i>conjugated trans double bonds</i>                          |
| 1469 m-s                  | 1464 m-s                  | $\delta$ CH <sub>2</sub> + $\delta$ asCH <sub>3</sub> bending vibrations |
| 1390                      |                           | $\tau$ CH <sub>2</sub>                                                   |
| 1371 m                    | 1379 m                    | $\delta$ sCH <sub>3</sub>                                                |
| 1334 w                    | 1334 w                    | $w$ CH <sub>2</sub>                                                      |
| 1298 m-w                  | 1298 m-w                  |                                                                          |
| 1278 m                    | 1278 m                    |                                                                          |
| 1260 m                    | 1260 m                    |                                                                          |
| 1242 m                    | 1242 m                    |                                                                          |
| 1218 m                    | 1218 m                    |                                                                          |
| 1196 m                    | 1196 m                    |                                                                          |
| 1177 s                    | 1169 s                    | $\nu$ aC-O-C ester link                                                  |
| 1110 m-w                  | 1110 m-w                  | $\nu$ bC-O-C ester link                                                  |
| 1050, 1009, 982           | 1050                      | $\nu$ C-C                                                                |
|                           | 977 w                     | $\delta$ oop +C-H (trans)                                                |
| 894                       |                           | $\rho$ CH <sub>3</sub><br>$\delta$ oop =C-H (cis)                        |
|                           |                           | $\delta$ oop =C-H (cis)                                                  |
| 716                       |                           | $\rho$ CH <sub>2</sub>                                                   |

**Table S5** Neat linseed oil formulations at 0 days of ageing and after 40 days of air drying: integral calculations

|      |           |  |  |  |  |
|------|-----------|--|--|--|--|
| Band | 1820-1570 |  |  |  |  |
|------|-----------|--|--|--|--|

|                 | <i>Mock-up #1</i> | <i>Mock-up #2</i> | <i>Mock-up 3#</i> | <i>Average</i> | <i>STDV.p</i> |
|-----------------|-------------------|-------------------|-------------------|----------------|---------------|
| <i>CP 0</i>     | 69.33             | 68.76             | 68.91             | 69.00          | 0.24          |
| <i>CP 0-40</i>  | 145.2             | 143.6             | 132.2             | 140.33         | 5.79          |
| <i>RF 0</i>     | 70.17             | 69.78             | 69.46             | 69.80          | 0.29          |
| <i>RF 0-40</i>  | 98.56             | 104.7             | 94.14             | 99.13          | 4.33          |
| <i>StL 0</i>    | 59.89             | 59.68             | 59.69             | 59.75          | 0.10          |
| <i>StL 0-40</i> | 82.82             | 86.51             | 112.1             | 93.81          | 13.02         |
|                 |                   |                   |                   |                |               |
| Band            | 1450-400          |                   |                   |                |               |
|                 | <i>Mock-up #1</i> | <i>Mock-up #2</i> | <i>Mock-up 3#</i> | <i>Average</i> | <i>STDV.p</i> |
| <i>CP 0</i>     | 70.14             | 60.56             | 76.58             | 69.09          | 6.58          |
| <i>CP 0-40</i>  | 215.43            | 212.2             | 183.3             | 203.64         | 14.45         |
| <i>RF 0</i>     | 83.03             | 91.72             | 103.2             | 92.65          | 8.26          |
| <i>RF 0-40</i>  | 142.8             | 158.2             | 138.43            | 146.48         | 8.48          |
| <i>StL 0</i>    | 15.38             | 36.36             | 29.45             | 27.06          | 8.73          |
| <i>StL 0-40</i> | 75.18             | 90.66             | 88.77             | 84.87          | 6.90          |
|                 |                   |                   |                   |                |               |
| Integral ratio  |                   |                   |                   |                |               |
|                 | CP 0-40/CP 0      | RF 0-40/RF 0      | StL 0-40/StL0     |                |               |
| 1820-1570       | 2.03              | 1.42              | 1.57              |                |               |
| 1450-400        | 2.95              | 1.58              | 3.14              |                |               |

**Table S6** Neat linseed oil formulations: Ratio of integrals (1900-1550 cm<sup>-1</sup>): (3200-2800 cm<sup>-1</sup>) [31]

|          | <i>Mock-up#1</i> | <i>Mock-up#2</i> | <i>Mock-ups#3</i> | <i>Averag</i> | <i>STDV.p</i> |
|----------|------------------|------------------|-------------------|---------------|---------------|
| CP 0     | 0.55             | 0.55             | 0.55              | 0.55          | 0.00          |
| CP 0-40  | 1.19             | 1.15             | 1.05              | 1.13          | 0.06          |
| CP 2     | 1.41             | 1.42             | 1.46              | 1.43          | 0.02          |
| CP 4     | 1.41             | 1.38             | 1.38              | 1.39          | 0.02          |
| CP 7     | 1.24             | 1.26             | 1.26              | 1.25          | 0.01          |
| CP 14    | 1.19             | 1.35             | 1.33              | 1.29          | 0.07          |
| CP 21    | 1.39             | 1.39             | 1.39              | 1.39          | 0.00          |
| CP 28    | 1.39             | 1.39             | 1.37              | 1.38          | 0.01          |
| RF 0     | 0.61             | 0.61             | 0.62              | 0.61          | 0.00          |
| RF 0-40  | 0.85             | 0.89             | 0.79              | 0.84          | 0.04          |
| RF 2     | 1.44             | 1.31             | 1.28              | 1.35          | 0.07          |
| RF 4     | 1.34             | 1.33             | 1.21              | 1.29          | 0.06          |
| RF 7     | 1.43             | 1.45             | 1.20              | 1.36          | 0.11          |
| RF 14    | 1.26             | 1.24             | 1.23              | 1.24          | 0.01          |
| RF 21    | 1.29             | 1.29             | 1.29              | 1.29          | 0.00          |
| RF 28    | 1.24             | 1.30             | 1.32              | 1.29          | 0.04          |
| StL 0    | 0.50             | 0.51             | 0.51              | 0.51          | 0.00          |
| StL 0-40 | 0.70             | 0.71             | 0.87              | 0.76          | 0.08          |
| StL 2    | 0.93             | 0.81             | 1.04              | 0.93          | 0.09          |
| StL 4    | 1.00             | 0.90             | 0.91              | 0.94          | 0.05          |

|        |      |      |      |      |      |
|--------|------|------|------|------|------|
| StL 7  | 0.89 | 0.66 | 0.64 | 0.73 | 0.11 |
| StL 14 | 0.55 | 0.55 | 0.55 | 0.55 | 0.10 |
| StL 21 | 1.19 | 1.15 | 1.05 | 1.13 | 0.01 |
| StL 28 | 1.41 | 1.42 | 1.46 | 1.43 | 0.00 |

**Table S7** Neat linseed oil formulations: Ratio of derivatives' integrals (1730-1695 cm<sup>-1</sup>): (1760-1730 cm<sup>-1</sup>) [32]

|          | <i>Mock-up#1</i> | <i>Mock-up#2</i> | <i>Mock-up#3</i> | <i>Average</i> | <i>STDV.p</i> |
|----------|------------------|------------------|------------------|----------------|---------------|
| CP 0     | 0.27             | 0.27             | 0.27             | 0.27           | 0.00          |
| CP 0-40  | 0.21             | 0.17             | 0.14             | 0.18           | 0.03          |
| CP 2     | 0.35             | 0.36             | 0.33             | 0.35           | 0.01          |
| CP 4     | 0.38             | 0.42             | 0.42             | 0.41           | 0.02          |
| CP 7     | 0.42             | 0.44             | 0.44             | 0.43           | 0.01          |
| CP 14    | 0.77             | 0.83             | 0.83             | 0.81           | 0.03          |
| CP 21    | 1.30             | 1.28             | 1.33             | 1.31           | 0.02          |
| CP 28    | 1.79             | 1.79             | 1.80             | 1.79           | 0.00          |
| RF 0     | 0.27             | 0.28             | 0.27             | 0.27           | 0.00          |
| RF 0-40  | 0.13             | 0.13             | 0.13             | 0.13           | 0.00          |
| RF 2     | 0.27             | 0.17             | 0.18             | 0.20           | 0.04          |
| RF 4     | 0.39             | 0.39             | 0.31             | 0.37           | 0.04          |
| RF 7     | 0.47             | 0.47             | 0.35             | 0.43           | 0.06          |
| RF 14    | 0.79             | 0.79             | 0.80             | 0.79           | 0.00          |
| RF 21    | 1.25             | 1.24             | 1.24             | 1.24           | 0.01          |
| RF 28    | 1.73             | 1.68             | 2.18             | 1.86           | 0.23          |
| StL 0    | 0.28             | 0.28             | 0.28             | 0.28           | 0.00          |
| StL 0-40 | 0.22             | 0.22             | 0.22             | 0.22           | 0.00          |
| StL 2    | 0.21             | 0.20             | 0.23             | 0.21           | 0.01          |
| StL 4    | 0.30             | 0.27             | 0.28             | 0.28           | 0.01          |
| StL 7    | 0.33             | 0.22             | 0.26             | 0.27           | 0.05          |
| StL 14   | 0.27             | 0.27             | 0.27             | 0.27           | 0.07          |
| StL 21   | 0.21             | 0.17             | 0.14             | 0.18           | 0.01          |
| StL 28   | 0.35             | 0.36             | 0.33             | 0.35           | 0.00          |

**Table S8** Oil-impregnated mock-ups: Ratio of derivatives integrals (1730-1695 cm<sup>-1</sup>): (1760-1730 cm<sup>-1</sup>)

|        | <i>Mock-up#1</i> | <i>Mock-up#2</i> | <i>Mock-up#3</i> | <i>Average</i> | <i>STDV.p</i> |
|--------|------------------|------------------|------------------|----------------|---------------|
| CCP 0  | 0.76             | 0.67             | 0.77             | 0.73           | 0.05          |
| CCP 2  | 0.87             | 0.89             | 0.89             | 0.88           | 0.01          |
| CCP 4  | 0.98             | 0.98             | 0.98             | 0.98           | 0.00          |
| CCP 7  | 1.29             | 1.29             | 1.26             | 1.28           | 0.01          |
| CCP 14 | 1.53             | 1.44             | 1.28             | 1.41           | 0.10          |
| CCP 21 | 2.01             | 1.92             | 1.93             | 1.96           | 0.04          |
| CCP 28 | 2.06             | 1.94             | 1.71             | 1.90           | 0.14          |
| MCP 0  | 0.56             | 0.58             | 0.50             | 0.55           | 0.03          |

|        |      |      |      |      |      |
|--------|------|------|------|------|------|
| MCP 2  | 0.52 | 0.45 | 0.49 | 0.49 | 0.03 |
| MCP 4  | 0.49 | 0.34 | 0.50 | 0.44 | 0.08 |
| MCP 7  | 0.61 | 0.71 | 0.57 | 0.63 | 0.06 |
| MCP 14 | 0.54 | 0.71 | 0.56 | 0.61 | 0.08 |
| MCP 21 | 0.84 | 0.71 | 0.72 | 0.75 | 0.06 |
| MCP 28 | 0.68 | 0.67 | 0.67 | 0.67 | 0.01 |
| KCP 0  | 0.57 | 0.56 | 0.60 | 0.58 | 0.02 |
| KCP 2  | 0.46 | 0.39 | 0.32 | 0.39 | 0.06 |
| KCP 4  | 0.55 | 0.49 | 0.42 | 0.49 | 0.05 |
| KCP 7  | 0.61 | 0.41 | 0.34 | 0.46 | 0.12 |
| KCP 14 | 0.81 | 0.63 | 0.87 | 0.77 | 0.10 |
| KCP 21 | 0.91 | 0.92 | 0.71 | 0.85 | 0.10 |
| KCP 28 | 1.07 | 0.99 | 1.05 | 1.04 | 0.03 |

(\*) Note: Numbering of references respond to those listed in the paper.

## Figures

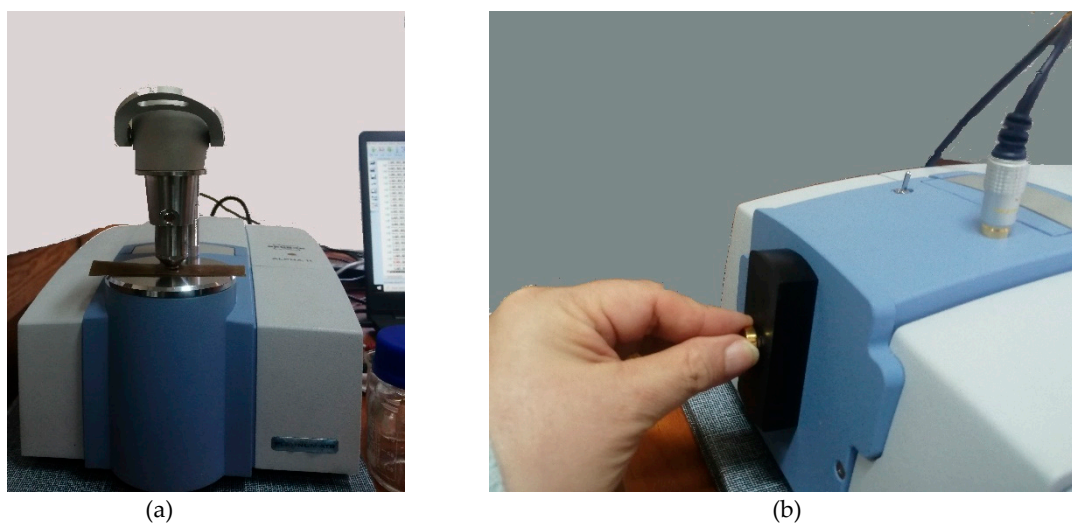

**Figure S1** Images of the FTIR methodology used for the different types of analysis: (a) the set-up for the ATR-FTIR analysis for plain paper and oil-impregnated mock-ups, and (b) the set-up for Reflectance FTIR for the oil films derived from the oil extraction of the oil-impregnated mock-ups

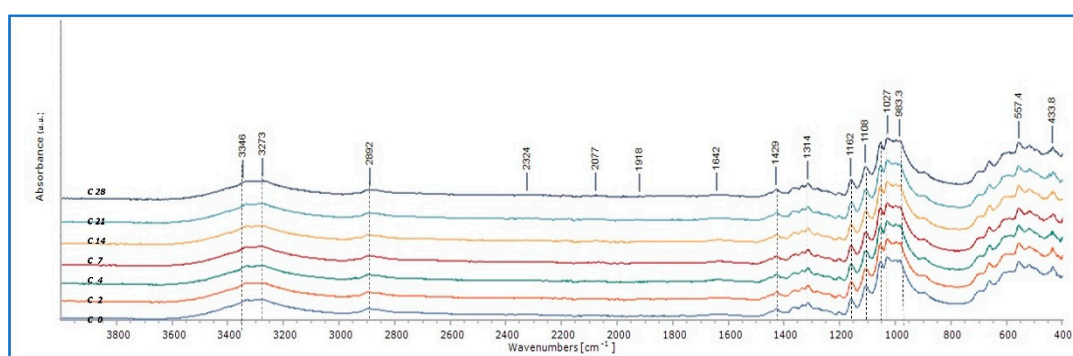

**Figure S2** ATR-FTIR spectra of plain Cotton (C ) mock-ups at all stages of artificial ageing (0-28 days), in an overlay display.

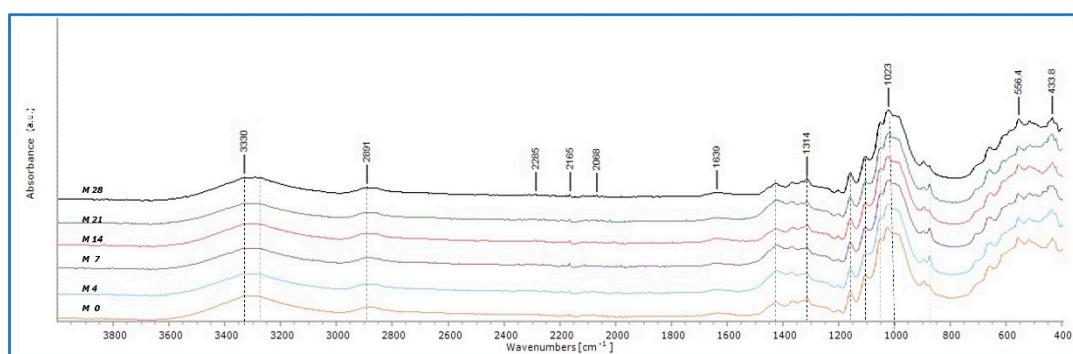

**Figure S3** ATR-FTIR spectra of plain Montval (M ) mock-ups at all stages of artificial ageing (0-28 days), in an overlay display.

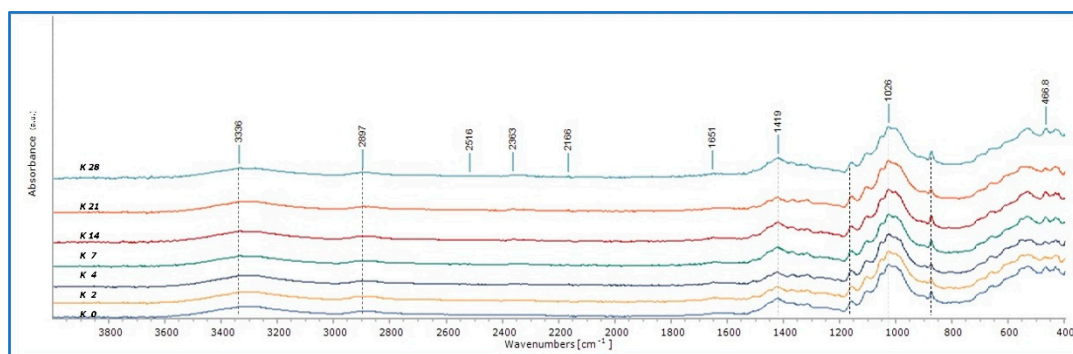

**Figure S4** ATR-FTIR spectra of plain Kraft (K) mock-ups at all stages of artificial ageing (0-28 days), in an overlay display.

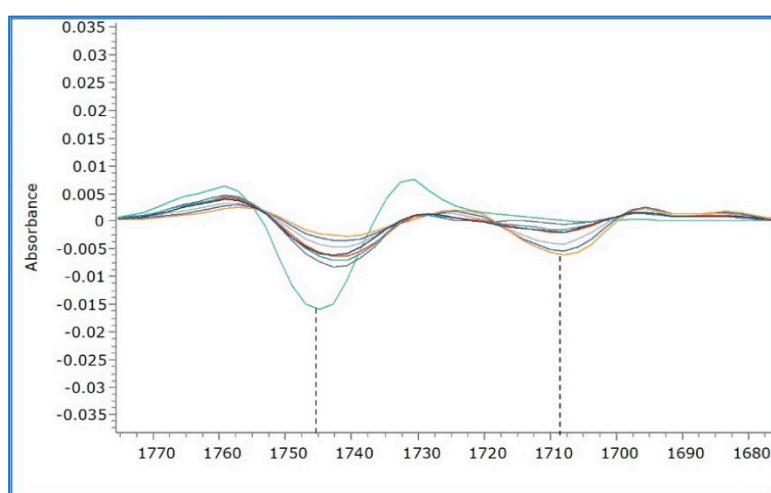

**Figure S5** The derivatives of the CP spectra at all ageing stages, on the band 1760-1700  $\text{cm}^{-1}$

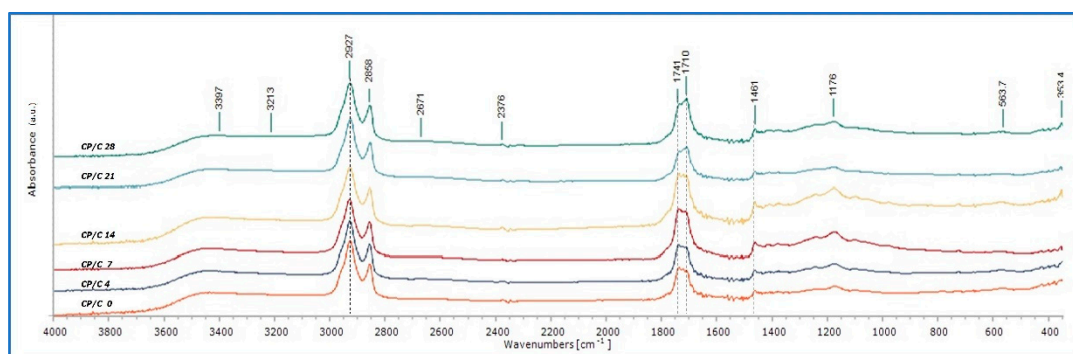

**Figure S6** The reflection-FTIR spectra of CP extraction from Cotton oil-impregnated mock-ups upon ageing.

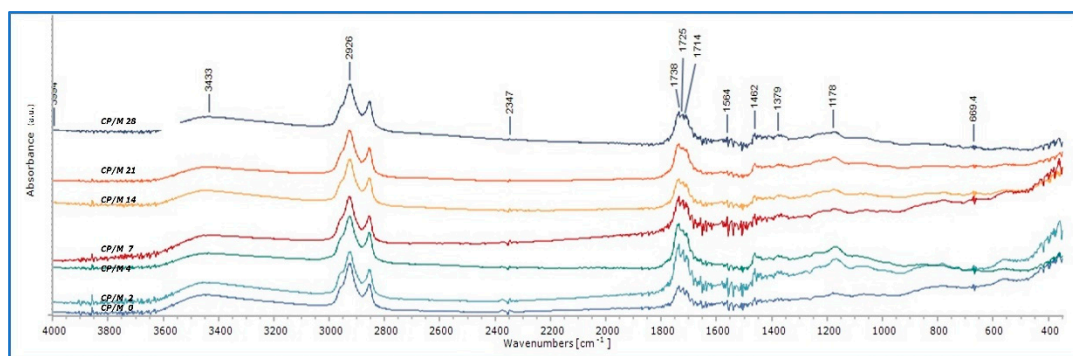

**Figure S7** The reflection-FTIR spectra of CP extraction from Montval oil-impregnated mock-ups upon ageing.

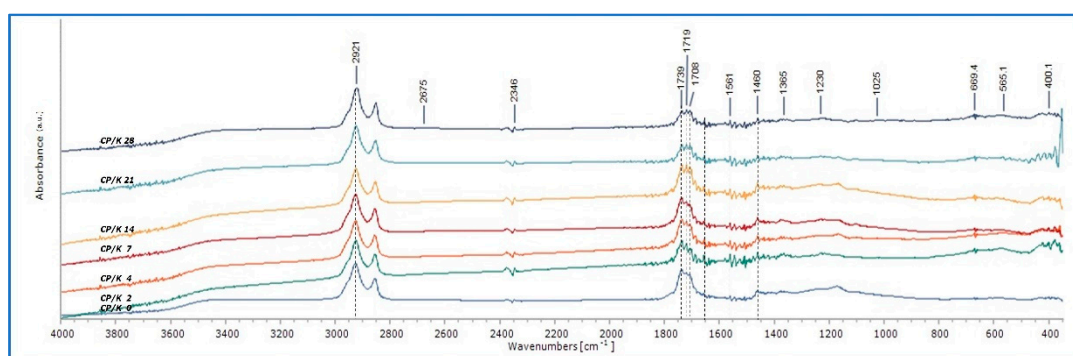

**Figure S8** The reflection-FTIR spectra of CP extraction from Kraft oil-impregnated mock-ups upon ageing.

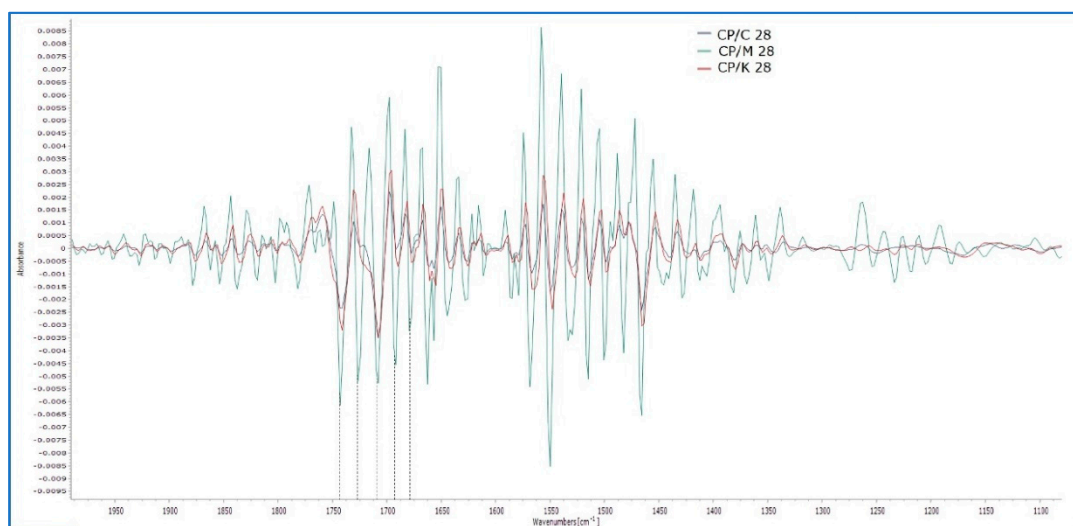

**Figure S9** Detail image of the derivatives of CPs reflection spectra that derived from the extraction of C, M, and K oil-impregnated mock-ups, at the final stage of ageing. The formation of several peaks on the band 1700-1550cm<sup>-1</sup> is clear.
